# 1 **Systems Biology Theory Clarification of a Controversy in**

## 2 **Pancreatic Beta Cell Regeneration**

3 **Haoran Cai<sup>1,3</sup>, Runtan Cheng<sup>1</sup>, Ruoshi Yuan<sup>2</sup>, Xiaomei Zhu<sup>5\*</sup>, Ping**  
4 **Ao<sup>1,2,4,5\*</sup>**

5 <sup>1</sup> Key Laboratory of Systems Biomedicine (Ministry of Education), Shanghai  
6 Center for Systems Biomedicine, Shanghai Jiao Tong University, 800  
7 Dongchuan Road, Shanghai 200240, China

8 <sup>2</sup> Department of Systems Biology, Harvard Medical School, Boston, MA 02115,  
9 USA

10 <sup>3</sup> Department of Biostatistics and Computational Biology, Dana Farber Cancer  
11 Institute, Boston, MA 02115, USA

12 <sup>4</sup> State Key Laboratory for Oncogenes and Related Genes, Shanghai Cancer  
13 Institute, Shanghai Jiao Tong University School of Medicine, Shanghai 200240,  
14 China

15 <sup>5</sup> Shanghai Center for Quantitative Life Sciences and Physics Department,  
16 Shanghai University, Shanghai 200444, China

17 \* Co-senior author

18 Corresponding author: [aoping@sjtu.edu.cn](mailto:aoping@sjtu.edu.cn)

19

20

21

22

23

24

25

26

27

## 28 **ABSTRACT**

29 Whether new pancreatic beta-cells arise via pre-existing beta-cells or from  
30 differentiation of precursor cells – a question of fundamental importance for diabetic  
31 therapy – has long been debated. Recent experiments suggest that multipotent  
32 precursors from adult mouse pancreas, that give rise to beta-cells, do exist. However,  
33 such a finding is at odds with prior evidence that beta-cell expansions occurs  
34 exclusively through self-replication. Here we show that these two observations can be  
35 partially compatible. We use a systems biology approach to analyze the dynamics of  
36 the endogenous molecular-cellular network in the pancreas. Our results show that self-  
37 replicating ‘beta-cells’ can themselves be multipotent precursors. In addition, our model  
38 predicts heterogeneity in beta-cell regeneration and suggests various differentiation  
39 paths of precursors. This work therefore provides a means of reconciling an apparent  
40 contradiction in the field, but also sheds light on possible paths of beta-cell regeneration  
41 from a systems biology perspective.

42

## 43 **Introduction**

44 Diabetes has brought great public health burden as well as economic costs[1, 2], which  
45 is caused by the body's lack of proper response to insulin production (Insulin resistance)  
46 or the pancreas's inability to produce enough insulin. Both  $\beta$ -cell dysfunction and  
47 decreased  $\beta$ -cell mass account for insulin deficiency. It is now recognized that beta-cell  
48 loss is a common theme of type 1 diabetes and type 2 diabetes. For example, in patients  
49 with type 2 diabetes, the beta-cell mass was found to be reduced by 50%[3]. Thus, many  
50 studies have tried to elucidate the mechanisms that control beta cell formation and  
51 replacement in order to design regenerative therapy of diabetes[4, 5].

52

53 Yet, one highly controversial issue remains unsettled on the postnatal origins of beta  
54 cells: whether new pancreatic beta-cells arise via pre-existing beta-cells or  
55 differentiation of precursor cells. It has been found that adult beta-cell retains a small  
56 capacity for proliferation[6–8]. Surprisingly, a seminal lineage-tracing study found  
57 that the fraction of labeled beta-cells remained unchanged over a one-year chase  
58 period, suggesting that beta-cell expansion was driven by self-replication without any

59 contribution of precursor cell differentiation[9], which can be further amplified by  
60 subsequent studies[10, 11]. On the other hand, several studies have supported the idea  
61 that the formation of new endocrine cells is from the pancreatic stem cells since the  
62 late 19<sup>th</sup>-century [12–14], Recently, several studies have found that multipotent  
63 precursors do exist. A report argued that the beta-cells labeled in the lineage-tracing  
64 study may not necessarily be mature beta-cell and can be insulin-expressing  
65 precursors that give rise to endocrine cell types[15]. Another group also identified  
66 non-insulin-expressing cells in islets that could give rise to new insulin+ cells as a  
67 slow renewal for beta-cells.

68

69 Here we used a systems biology method, the endogenous molecular-cellular network  
70 theory, to clarify the contrasting observations from a systematic view. The theory is  
71 intended to analyze the complex biological process via the dynamics of the network  
72 system based on the fundamental properties of the biological system[16, 17]. The  
73 endogenous molecular-cellular network is composed of essential modules (specified by  
74 a set of nodes representing key proteins or signaling pathway) and crosstalk between

75 these modules, and then we analyze the dynamics on the network. We assume cell  
76 phenotypes are endogenous attractors underlying the endogenous molecular–cellular  
77 network. One of the most prominent predictions of endogenous network theory is the  
78 existence of quantitative functional landscape, where locally stable states are  
79 interconnected with each other through the transition states. The natural and qualitative  
80 consequence of the mathematical setup implies that natural conversion between two  
81 cell states may have patterns[17], and the topological structure of the functional  
82 landscape can be a natural framework for beta-cell regeneration. We sought to analyze  
83 the natural mechanisms at a network level by which beta cells are formed, where the  
84 observations of beta-cell expansion can be integrated into a single model.

## 85 **Methods**

### 86 **Construction of an endogenous network of pancreas development**

87 In this work, we chose a set of essential proteins to depict pancreatic core regulatory  
88 structures (detailed description in the unpublished paper). These proteins and their  
89 causal interactions form the core endogenous network of the pancreas.

## 90 **Quantitative description and analysis**

91 A set of ordinary differential equations (ODEs) were obtained to quantify the core  
92 dynamics on the pancreatic endogenous network. The dynamics of the  
93 activation/expression level of each protein  $x$  is governed by

$$94 \quad \frac{d[x]}{dt} = V_{max} * \frac{k * (\sum[\text{activator}]^n)}{1 + k * (\sum[\text{activator}]^n)} * \frac{1}{1 + k * (\sum[\text{inhibitor}]^n)} - \tau * [x] \quad (1)$$

95 where  $V_{max}$  represents the maximal production rate of protein  $x$ ,  $n$  represents Hill  
96 coefficients, and  $k$  represents dissociation constant. Specifically, the relative expression  
97 level of each protein was normalized to range from 0 to 1. The maximal production rate  
98  $V_{max}$  and degradation rate  $\tau$  were taken as 1. Here the values of  $n$  and  $k$  were 3 and  
99 10 while we conduct multiple simulation varying  $n$  and  $k$  within a reasonable range to  
100 grasp the key feature of activation or inhibition. The threshold of the sigmoid-shaped  
101 function, at which the value of  $x$  was expected to be half maximal. Two independent  
102 algorithms, random sampling and Newton's method, were adopted to calculate the  
103 robust fixed points of the dynamical system (see Supplementary Materials).

104

105 In the dynamic system (Eqn. 1), we perturbed the system with small random noise when

106 it stayed at an unstable state (transition state or hyper-transition state) to obtain the  
107 topological structure of landscape. We utilized random-perturbed states as the initial  
108 value of the system and let the dynamical systems iterate at the constraints and tracked  
109 routes of system evolution. We obtained the trajectories from each unstable state to it  
110 connected stable states and recorded the unstable states that each trajectory passed  
111 through.

112

113 Independent datasets[18] are used to validate the model results. Firstly, four pathways  
114 expression levels are denoted by the average of targeted proteins (pathways). We  
115 averaged expression level by cell type annotation. Then Z-score normalization is  
116 conducted respectively for single cell transcriptome and modeling results (12 stable  
117 states and 23 transition states) over each protein (pathways). Eventually, we do linearly  
118 rescale for all the expression value to 0 – 1.

119

120

## 121 **Results**

122 We obtained 12 stable states and 23 transition states in the simulations of our model  
123 (see in Table S2, Table S3). Each state is depicted by the combinational expression level  
124 of endogenous network nodes. We assumed pancreatic phenotypes are robust stable  
125 states of the endogenous network, thus biological meanings were linked to the stable  
126 states emerging from the endogenous network (see in Figure 2, Figure S2). The  
127 interconnections among phenotypic states reveal the lineage conversion routes in the  
128 pancreas, making it possible to understand the maintenance of pancreas homeostasis  
129 from a systematic view. In our work, a beta cell proliferation landscape could be  
130 obtained describing how states connect with each other, part of the whole pancreatic  
131 landscape (Figure 3).

132

133 By state-connected graph, multiple potential sources including 1 stable state and 11  
134 transition states for expansion can be identified (Figure 3). By examining the expression  
135 pattern, U23, S3, U2 states are found to be insulin-producing cells that could give rise  
136 to formation of new beta-cells and other phenotypic of states (See in Figure S1)



137 according to our modeling results, as markers that activate Ins are highly expressed at  
138 these states (Figure 4). This can be validated by the report that identified an multipotent  
139 insulin-expressing population as the precursor of beta-cells[15]. While states such as  
140 U11, U12, U20 that do not express a high level of Pdx1, MafA (Figure 4) are insulin-  
141 negative states in our model. And they maintained the capacity to give rise to new beta-  
142 cells as well (Figure 3), consistent with the postulations from [19] that Insulin-negative  
143 precursors participate in the renewal of the beta-cell mass during aging. In this way our  
144 model not only explained two evidences straightforwardly but integrated the evidences  
145 of existence of precursor cells into a single framework from a systematic view.

146

147 Furthermore, our model suggested that the sources of beta-cells regeneration may even  
148 be more heterogeneous than expected. For example, some of the precursor states are  
149 unipotent to beta-cells according to the complete landscape such as U2, U16, U23,  
150 suggesting a capacity in vivo that might be exploited to exclusively generating beta-  
151 cells for therapeutic cell replacement. Furthermore, as the newly differentiated beta-  
152 cells are hard to be distinguished from pre-existing population in many experimental

153 models, the expression characteristics of multiple possible pre-beta states can be  
154 obtained (see in Table S2, Table S3) through our modeling to enable future experimental  
155 validations for post-natal origin of beta-cells.

## 156 **Discussion**

157 Whether new beta cells arise from differentiation or by the proliferation of existing beta  
158 cells has remained a highly controversial issue for decades. Dor's study which used an  
159 mice model to trace the fraction of insulin-expressing cells suggested that self-  
160 replication was the major source of beta-cell regeneration exclusively[9]. The existence  
161 of progenitor-like insulin-positive states in our model, distinct from mature beta-cells,  
162 was probably the partial reason why they found the new insulin-positive cells are  
163 differentiated from existing insulin-expressing cells. Because the precursor cells can  
164 express insulin, lineage labelling of beta cells by the insulin expression could not  
165 discriminate between whether it is self-replication of pre-existing mature beta cells or  
166 differentiation from stem cells that give rise to the formation of new beta-cells.

167 However, two evidences demonstrated that the multipotent insulin expressing  
168 precursors could not provide total reconciliation with the work of [9]. First, insulin-  
169 negative states are possible to contributed to new insulin+ cells replacement both  
170 theoretically and experimentally. Secondly, the precursor beta cells identified before  
171 are multipotent[15] and there is no unipotent insulin expressing state in our landscape  
172 while Dor and his colleagues found the labeled cells only give rise to beta cells. This  
173 could be attributed by techniques: One reason related is that the staining method that  
174 Dor took probably hindered the visualization of labeled cells giving rise to states other  
175 than beta cells. In addition, it may overlook the cases that the pre-existing mature beta  
176 cells retain the capacity to dedifferentiate to an unipotent progenitor state and re-  
177 differentiate back, which indeed has been reported by several studies[20, 21]. Since  
178 these precursor cells are quite similar with the mature beta cells, it might be hard to  
179 discriminate them in experimental models. Another reason might concern with the  
180 small fraction of progenitor states: the lineage tracing results merely reflect the  
181 behaviors of mature beta-cells.

182 Enlightened by pancreatic development endogenous network, we constructed the  
183 quantitative landscape of pancreatic development without prior knowledge of beta-  
184 cell expansion. Emerged stable states are linked to phenotypic states within the  
185 pancreas, reproducing the core features of phenotypic states within pancreas to better  
186 understand the beta cell replacement. We conducted perturbation analysis to generate  
187 topological graph describing interconnection among states, serving as the guideline to  
188 understand the beta-cell replacement. The roadmap of beta cell regeneration can be  
189 established: Various possible states retain the capacity to give rise to new beta cells  
190 either during development, aging or even under injury. Our results supported that the  
191 new post-natal beta cells can originate from the unmatured pre-beta cells. The  
192 precursors can be rather heterogenous, characterized by combinational expression  
193 level of genes(proteins) in our landscape. Besides, we showed that pre-existing beta-  
194 cells could transiently dedifferentiate to a progenitor-like state and facilitate the beta-  
195 cell replacement, which can be the case hindered by the experimental techniques. The  
196 observations were integrated into a single model, and an explanation of the beta-cell  
197 origins within adult pancreas has been obtained from a systems biology theory.

198 One remaining question is that to which extent the beta-cell expanded by self-  
199 replication or from precursor cells. It is also of interests to know conditions that a  
200 certain phenotypic state of cells will occur and contribute more to the beta-cell  
201 expansion. We acknowledge that the network has been greatly simplified. It is expected  
202 that a more comprehensive network can reproduce more detailed features through the  
203 inclusion of more modules, for example, cell cycle. These issues require an explicit  
204 inclusion of stochastic effects, where the potential energy landscape can be used to  
205 explore more detailed issues[22, 23].

206

207 Apart from elucidating the controversy in this work, the dynamical network system  
208 we built may have other applications. It should be pointed out that our model does not  
209 exclude the possibility that other terminally differentiated phenotypes of cells trans-  
210 differentiate into beta-cells for their expansion. In the light of our hypothesis, these  
211 trans-differentiation behaviors could correspond to the states traveling in the  
212 landscape (Figure 3) as well. Indeed, stem cells have been observed in multiple  
213 experiment models[24–26]. Hence, it is possible that other multiple routes can

214 generate new beta-cells. Our model provides a framework to understand the  
215 interconversion of cell states during aging or embryonic development. The patterns  
216 and preferred routes that our model implies can be further studied to predict potential  
217 target genes and develop successful therapies for beta cell regeneration in the  
218 treatment of diabetes.

219

220

221

222

223

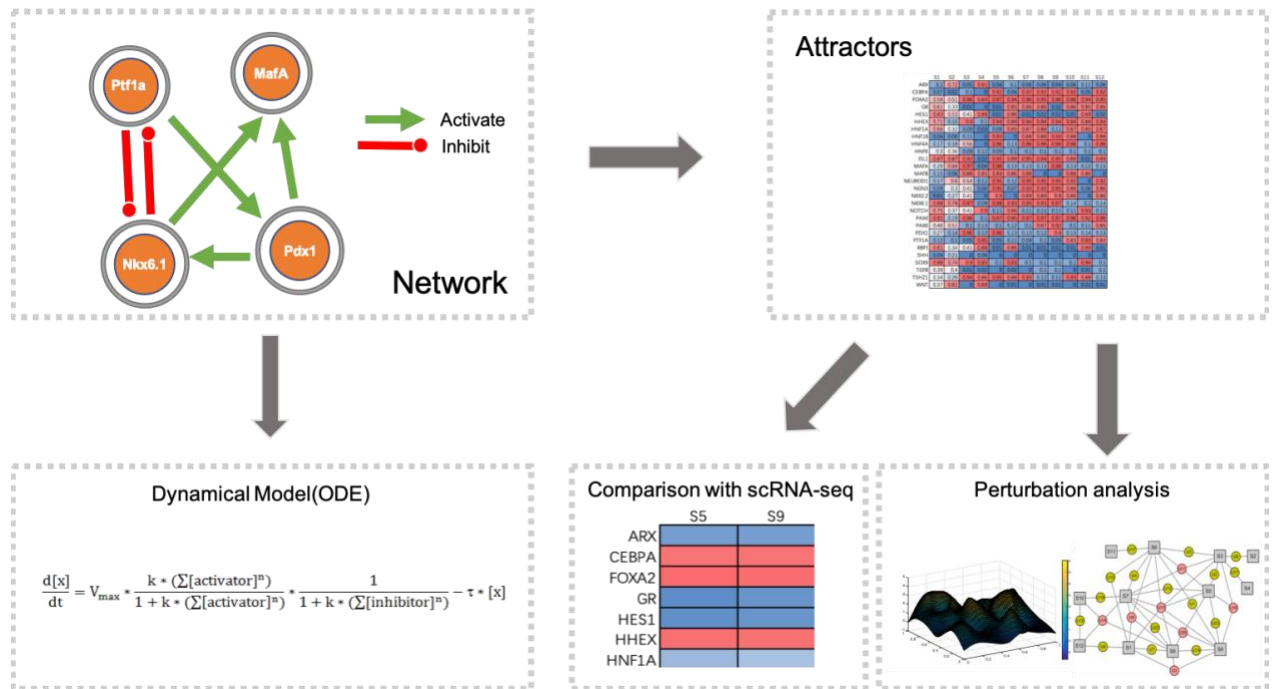

224

225

Figure 1

226 **Figure 1. Schematics of endogenous molecular–cellular network modelling.** The interactions were  
 227 collected from the literature. Ordinary differential equations (described in Methods and Supplementary  
 228 Material) were used to compute the attractors generated by the constructed pancreatic developmental  
 229 network structure. Two algorithms (see Supplementary Materials) were performed, demonstrating  
 230 robustness of the simulation results. Comparison of gene expression levels predicted by the attractors  
 231 with single cell RNA-seq data validated our scientific simulation results. Multiple phenotypes within  
 232 pancreas corresponded to the attractors of network dynamics.

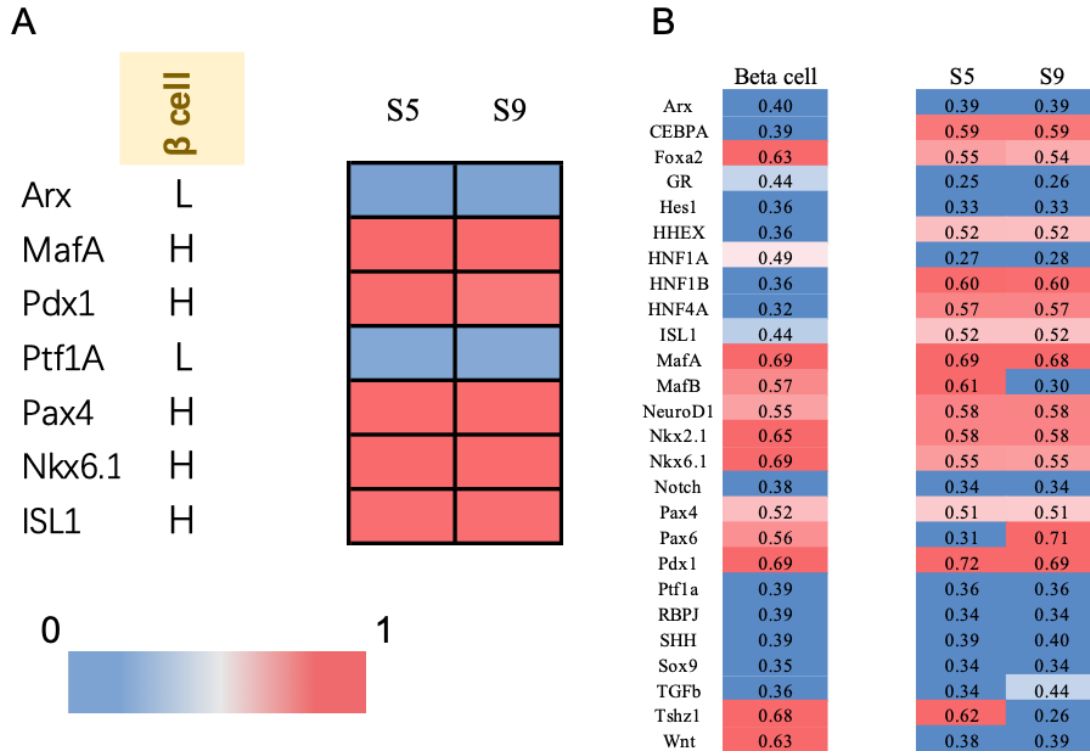

233

Figure.2

**Figure 2. Linking biological meaning to stable states and its validation comparing with RNA-Seq.** **A.** We used the known markers (L denotes Low expression, H denotes High expression), we could easily link the cell type to corresponding stable states generated from the endogenous network (See Figure S2). **B** The biological meanings of beta cell states were validated at the molecular level. We selected the relevant expression data in a published dataset[18] and set a threshold to find out the high or low expressed status of each gene. When we set the threshold as 0.5, the agreement ratio was 71.2%

234



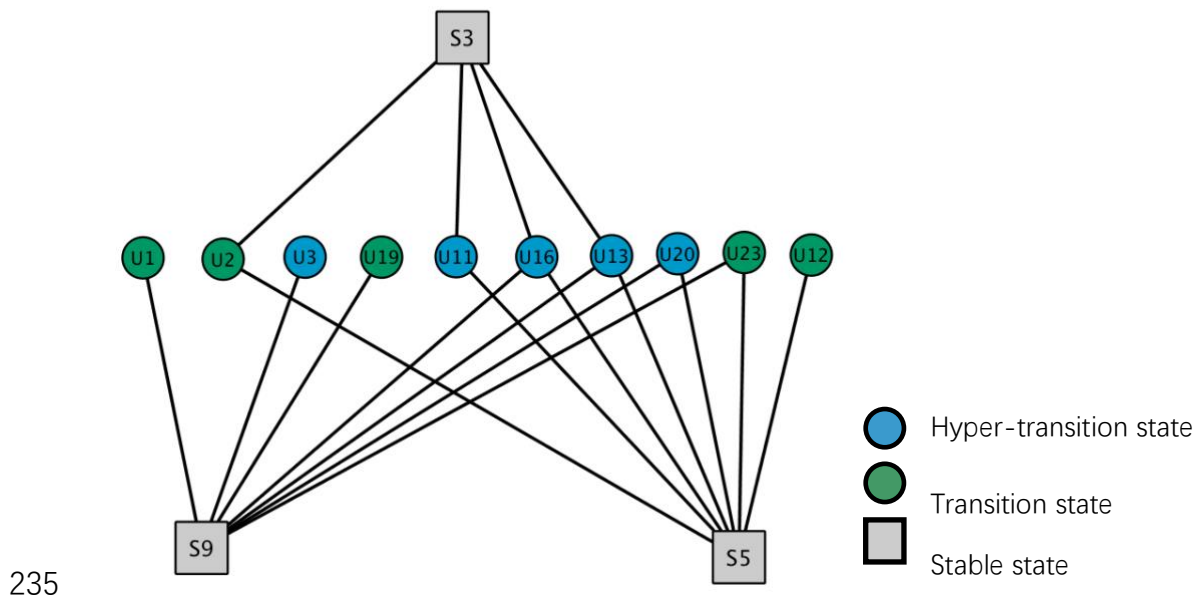

**Figure 3. The network dynamics incorporated the seemingly conflicted beta-cell expansion models.** This state connection graph is a part of the whole landscape (See Table S1) through perturbation analysis. Each state is depicted by the expression level of a set of molecular we selected to form the endogenous network. S5, S9 represented beta cell states while all the other phenotypic states including stable states S3 and transition state/hyper-transition state retain the potential to differentiate into the beta cell. Stable state: all the eigenvalues of the Jacobian matrix of dynamical system at this state were negative; Transition state: one eigenvalue of the Jacobian matrix at this state was positive while the others were negative; Hyper-transition state: more than one positive eigenvalues of the Jacobian matrix at this state were positive.

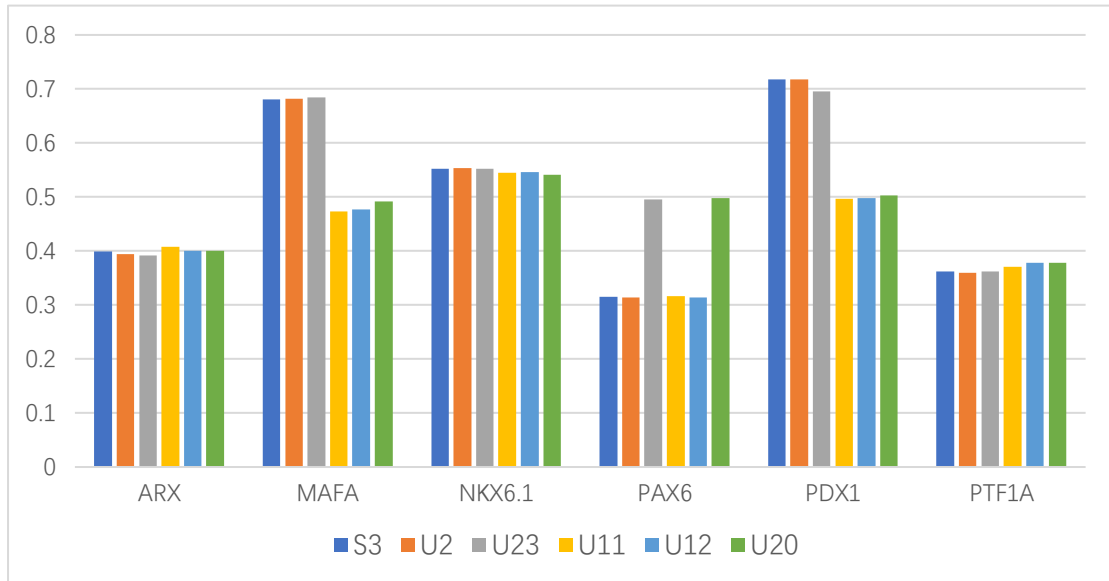

237

238

*Figure 4*

239

**Figure 4. Modeling results characterized the insulin expression features of putative beta cell**

240

**precursor through a quantitative expression level of proteins.** States that highly express MafA, Nkx6.1,

241

Pax6, Pdx1 and low express Arx, Ptf1a are more likely to express insulin[27–30]. State S3, U2, U23 were assumed

242

to be insulin-positive. Due to the lack of expression of MafA, Pdx1, U11, U12, U20 are probably insulin-negative

243

cells.

244

245

246

247

## 248 **Reference**

- 249 1. Dieren S Van, Beulens JWJ, Schouw YT Van Der, Grobbee DE, Neal B. The global  
250 burden of diabetes and its complications : an emerging pandemic. 2016.
- 251 2. Statements ADA. Hyperglycemic Crises in Adult Patients. 2009;32.
- 252 3. Rhodes CJ. Type 2 Diabetes-a Matter of {beta}-Cell Life and Death? Science (80- ).  
253 2005.
- 254 4. Cheng CW, Villani V, Buono R, Wei M, Kumar S, Yilmaz OH, et al. Fasting-  
255 Mimicking Diet Promotes Ngn3-Driven  $\beta$ -Cell Regeneration to Reverse Diabetes. Cell.  
256 2017.
- 257 5. Zeng C, Mulas F, Sui Y, Guan T, Miller N, Tan Y, et al. Pseudotemporal Ordering of  
258 Single Cells Reveals Metabolic Control of Postnatal  $\beta$  Cell Proliferation. Cell Metab.  
259 2017;25:1160–1175.e11.
- 260 6. Messier B, Leblond CP. Cell proliferation and migration as revealed by  
261 radioautography after injection of thymidine<sup>3</sup>H into male rats and mice. Am J Anat.  
262 1960.

- 263 7. Kassem SA, Ariel I, Thornton PS, Scheimberg I, Glaser B.  $\beta$ -Cell proliferation and  
264 apoptosis in the developing normal human pancreas and in hyperinsulinism of infancy.  
265 Diabetes. 2000.
- 266 8. Acini MP. Demonstration of Expanding Cell Populations in Mouse Pancreatic Acini  
267 and Islets. 1987;115.
- 268 9. Dor Y, Brown J, Martinez OI, Melton DA. Adult pancreatic  $\beta$ -cells are formed by  
269 self-duplication rather than stem-cell differentiation. Nature. 2004;429:41–6.  
270 doi:10.1038/nature02520.
- 271 10. Nir T, Melton D a, Dor Y. Recovery from diabetes in mice by beta cell regeneration.  
272 J Clin Invest. 2007;117:2553–61.
- 273 11. Salpeter SJ, Klein AM, Huangfu D, Grimsby J, Dor Y. Glucose and aging control  
274 the quiescence period that follows pancreatic beta cell replication. Development.  
275 2010;137:3205–13. doi:10.1242/dev.054304.
- 276 12. Bensley RR. Studies on the pancreas of the guinea pig. Am J Anat. 1911;12:297–  
277 388.
- 278 13. Bonner-Weir S, Weir GC. New sources of pancreatic beta-cells. Nat Biotechnol.

279 2005;23:857–61.

280 14. Endocrine P, Zulewski H, Abraham EJ, Gerlach MJ, Daniel PB, Moritz W, et al.

281 Multipotential Nestin-Positive Stem Cells Isolated From. 1:521–33.

282 15. Smukler SR, Arntfield ME, Razavi R, Bikopoulos G, Karpowicz P, Seaberg R, et

283 al. The adult mouse and human pancreas contain rare multipotent stem cells that express

284 insulin. *Cell Stem Cell*. 2011;8:281–93.

285 16. Yuan R, Zhu X, Wang G, Li S, Ao P. Cancer as robust intrinsic state shaped by

286 evolution: a key issues review. *Reports Prog Phys*. 2017;80:042701. doi:10.1088/1361-

287 6633/aa538e.

288 17. Ao P, Galas D, Hood L, Zhu X. Cancer as robust intrinsic state of endogenous

289 molecular-cellular network shaped by evolution. *Med Hypotheses*. 2008;70:678–84.

290 18. Segerstolpe Å, Palasantza A, Eliasson P, Andersson E-M, Andréasson A-C, Sun X,

291 et al. Single-Cell Transcriptome Profiling of Human Pancreatic Islets in Health and

292 Type 2 Diabetes. *Cell Metab*. 2016;24:593–607. doi:10.1016/j.cmet.2016.08.020.

293 19. Liu H, Guz Y, Kedees MH, Winkler J, Teitelman G. Precursor cells in mouse islets

294 generate new  $\beta$ -cells in vivo during aging and after islet injury. *Endocrinology*.

295 2010;151:520–8.

296 20. Weinberg N, Ouziel-Yahalom L, Knoller S, Efrat S, Dor Y. Lineage tracing evidence  
297 for in vitro dedifferentiation but rare proliferation of mouse pancreatic  $\beta$ -cells. *Diabetes*.  
298 2007.

299 21. Ouziel-Yahalom L, Zalzman M, Anker-Kitai L, Knoller S, Bar Y, Glandt M, et al.  
300 Expansion and redifferentiation of adult human pancreatic islet cells. *Biochem Biophys*  
301 *Res Commun*. 2006.

302 22. Zhu XM, Yin L, Hood L, Ao P. Calculating biological behaviors of epigenetic states  
303 in the phage  $\gamma$  life cycle. *Funct Integr Genomics*. 2004;4:188–95.

304 23. Yuan R, Ao P. Beyond Itô versus Stratonovich. *J Stat Mech Theory Exp*. 2012;2012.

305 24. Chera S, Baronnier D, Ghila L, Cigliola V, Jensen JN, Gu G, et al. Diabetes recovery  
306 by age-dependent conversion of pancreatic  $\delta$ -cells into insulin producers. *Nature*.  
307 2014;514:503–7. doi:10.1038/nature13633.

308 25. Kopp JL, Grompe M, Sander M. Stem cells versus plasticity in liver and pancreas  
309 regeneration. *Nat Cell Biol*. 2016;18:238–45. doi:10.1038/ncb3309.

310 26. Katsuta H, Akashi T, Katsuta R, Nagaya M, Kim D, Arinobu Y, et al. Single

311 pancreatic beta cells co-express multiple islet hormone genes in mice. *Diabetologia*.

312 2010;53:128–38.

313 27. Tang DQ, Lu S, Sun YP, Rodrigues E, Chou W, Yang C, et al. Reprogramming liver-

314 stem WB cells into functional insulin-producing cells by persistent expression of Pdx1-

315 and Pdx1-VP16 mediated by lentiviral vectors. *Lab Investig*. 2006;86:83–93.

316 28. Xu L, Xu C, Zhou S, Liu X, Wang J, Liu X, et al. PAX4 promotes PDX1-induced

317 differentiation of mesenchymal stem cells into insulin-secreting cells. *Am J Transl Res*.

318 2017;9:874–86.

319 29. Grzeskowiak R, Amin J, Oetjen E, Knepel W. Insulin responsiveness of the

320 glucagon gene conferred by interactions between proximal promoter and more distal

321 enhancer-like elements involving the paired-domain transcription factor Pax6. *J Biol*

322 *Chem*. 2000;275:30037–45.

323 30. Aguayo-Mazzucato C, Koh A, El Khattabi I, Li WC, Toschi E, Jermendy A, et al.

324 Mafa expression enhances glucose-responsive insulin secretion in neonatal rat beta

325 cells. *Diabetologia*. 2011;54:583–93.

326
